# Supplementary material for: Prevalence and Phenotypic Antimicrobial Resistance among ESKAPE Bacteria and Enterobacterales Strains in Wild Birds
Source: MDPI journal article supplement (doi:10.3390/antibiotics11121825), 2022-12-15
Supplement: s1 [file s1]

**Table S3 – Classification of analysed wild birds species**

| <b>Family</b>    | <b>Common name</b>     | <b>Scientific name</b>               | <b>Number</b> |
|------------------|------------------------|--------------------------------------|---------------|
| Accipitridae     | Eurasian Sparrowhawk   | <i>Accipiter nisus</i>               | 2             |
|                  | Common Buzzard         | <i>Buteo buteo</i>                   | 20            |
|                  | Short-toed Snake Eagle | <i>Circaetus gallicus</i>            | 1             |
| Anatidae         | Mandarin Duck          | <i>Aix galericulata</i>              | 1             |
|                  | Mallard                | <i>Anas platyrhynchos</i>            | 2             |
|                  | Northern Shoveler      | <i>Anas clypeata</i>                 | 1             |
|                  | Mute Swan              | <i>Cygnus olor</i>                   | 1             |
| Apodidae         | Common Swift           | <i>Apus apus</i>                     | 4             |
| Ardeidae         | Western Cattle Egret   | <i>Bubulcus ibis</i>                 | 1             |
| Columbidae       | Common Pigeon          | <i>Columba livia</i> “domestica”     | 21            |
|                  | Eurasian Collared Dove | <i>Streptopelia decaocto</i>         | 5             |
|                  | Common Wood Pigeon     | <i>Columba palumbus</i>              | 1             |
| Corvidae         | Eurasian Jay           | <i>Garrulus glandarius</i>           | 2             |
|                  | Eurasian Magpie        | <i>Pica pica</i>                     | 1             |
| Falconidae       | Common Kestrel         | <i>Falco tinnunculus</i>             | 18            |
|                  | Peregrine Falcon       | <i>Falco peregrinus</i>              | 3             |
| Fringillidae     | European Goldfinch     | <i>Carduelis carduelis</i>           | 51            |
|                  | European Serin         | <i>Serinus serinus</i>               | 1             |
|                  | Hawfinch               | <i>Coccothraustes coccothraustes</i> | 1             |
| Phasianidae      | Common Pheasant        | <i>Phasianus colchicus</i>           | 1             |
| Rallidae         | Eurasian Coot          | <i>Fulica atra</i>                   | 1             |
| Recurvirostridae | Black-winged Stilt     | <i>Himantopus himantopus</i>         | 1             |
| Scolopacidae     | Eurasian Woodcock      | <i>Scolopax rusticola</i>            | 4             |
| Strigidae        | Little Owl             | <i>Athene noctua</i>                 | 2             |
|                  | Eurasian Scops Ow      | <i>Otus scops</i>                    | 2             |
|                  | European Eagle Owl     | <i>Bubo bubo</i>                     | 2             |
| Sylviidae        | Eurasian Blackcap      | <i>Sylvia atricapilla</i>            | 1             |
|                  | Sardinian Warbler      | <i>Sylvia melanocephala</i>          | 1             |
| Turdidae         | Common Blackbird       | <i>Turdus merula</i>                 | 5             |
|                  | Song Thrush            | <i>Turdus philomelos</i>             | 1             |
| Tytonidae        | Western Barn Owl       | <i>Tyto alba</i>                     | 4             |
| Upupidae         | Eurasian Hoopoe        | <i>Upupa epops</i>                   | 1             |
| <b>Total</b>     |                        |                                      | <b>163</b>    |
