# Supplementary material for: Prevalence and Phenotypic Antimicrobial Resistance among ESKAPE Bacteria and Enterobacterales Strains in Wild Birds
Source: MDPI journal article supplement (doi:10.3390/antibiotics11121825), 2022-12-15
Supplement: s1 [file s1]

**Table S2. Results of antibiograms enterobacterales strains**

| Bird species                 | Bacteria species                   | PRL | AMP | AMC | IMI | CRO | CAZ | CPD | AZM | C | CN | AK | TE | CIP | SXT | ESBL |
|------------------------------|------------------------------------|-----|-----|-----|-----|-----|-----|-----|-----|---|----|----|----|-----|-----|------|
| <i>Himantopus himantopus</i> | <i>E. coli</i>                     | S   | S   | S   | S   | S   | S   | S   | S   | S | S  | S  | S  | S   | S   | -    |
| <i>Turdus merula</i>         | <i>E. coli</i>                     | S   | S   | S   | R   | S   | S   | R   | S   | S | S  | S  | S  | S   | S   | -    |
| <i>Turdus merula</i>         | <i>C. freundii</i>                 | S   | R   | R   | S   | S   | S   | S   | S   | S | S  | S  | S  | S   | S   | -    |
| <i>Turdus merula</i>         | <i>E. coli</i>                     | S   | S   | S   | S   | S   | S   | S   | S   | S | S  | S  | R  | S   | S   | -    |
| <i>Turdus merula</i>         | <i>C. freundii</i>                 | S   | R   | R   | S   | S   | S   | S   | S   | S | S  | S  | S  | S   | S   | -    |
| <i>Turdus merula</i>         | <i>E. coli</i>                     | I   | S   | S   | S   | S   | S   | I   | S   | S | S  | S  | S  | S   | S   | -    |
| <i>Buteo buteo</i>           | <i>E. coli</i> *                   | R   | R   | R   | S   | R   | R   | R   | R   | S | I  | S  | R  | R   | R   | -    |
| <i>Buteo buteo</i>           | <i>P. mirabilis</i> *              | S   | R   | S   | I   | R   | S   | S   | R   | S | S  | S  | R  | S   | S   | -    |
| <i>Buteo buteo</i>           | <i>E. coli</i> *                   | R   | R   | R   | S   | S   | I   | R   | I   | S | R  | S  | R  | R   | R   | +    |
| <i>Buteo buteo</i>           | <i>S. enterica subsp. enterica</i> | I   | S   | S   | I   | R   | R   | R   | S   | S | S  | S  | S  | I   | S   | -    |
| <i>Buteo buteo</i>           | <i>E. coli</i>                     | S   | S   | S   | S   | S   | S   | I   | I   | S | S  | S  | S  | S   | S   | -    |
| <i>Buteo buteo</i>           | <i>E. coli</i> *                   | R   | R   | R   | S   | S   | R   | R   | S   | I | S  | S  | R  | S   | R   | +    |
| <i>Buteo buteo</i>           | <i>E. coli</i>                     | S   | S   | S   | S   | S   | S   | S   | S   | S | S  | S  | S  | S   | S   | -    |
| <i>Buteo buteo</i>           | <i>E. coli</i> *                   | I   | R   | R   | S   | R   | S   | S   | S   | S | S  | S  | S  | S   | S   | -    |
| <i>Buteo buteo</i>           | <i>E. aerogenes</i>                | S   | R   | R   | S   | S   | S   | S   | S   | S | S  | S  | S  | S   | S   | -    |
| <i>Buteo buteo</i>           | <i>K. pneumoniae</i> *             | R   | R   | R   | S   | R   | R   | R   | R   | S | S  | S  | R  | I   | R   | +    |
| <i>Buteo buteo</i>           | <i>K. pneumoniae</i> *             | R   | R   | R   | S   | R   | S   | R   | R   | S | S  | I  | R  | I   | R   | +    |
| <i>Buteo buteo</i>           | <i>E. cloacae</i>                  | S   | R   | R   | S   | S   | S   | S   | S   | S | S  | S  | S  | S   | S   | -    |
| <i>Buteo buteo</i>           | <i>E. coli</i>                     | S   | S   | S   | S   | S   | S   | S   | S   | S | S  | S  | S  | S   | S   | -    |
| <i>Buteo buteo</i>           | <i>E. coli</i>                     | S   | S   | S   | S   | S   | S   | S   | S   | S | S  | S  | S  | S   | S   | -    |
| <i>Buteo buteo</i>           | <i>E. cloacae</i>                  | S   | R   | R   | S   | S   | S   | S   | S   | S | S  | S  | S  | S   | S   | -    |
| <i>Buteo buteo</i>           | <i>C. freundii</i>                 | R   | R   | R   | S   | S   | R   | R   | S   | S | R  | R  | R  | R   | R   | +    |
| <i>Buteo buteo</i>           | <i>E. coli</i> *                   | R   | S   | S   | S   | S   | R   | R   | S   | S | R  | R  | R  | R   | R   | +    |
| <i>Buteo buteo</i>           | <i>K. pneumoniae</i> *             | R   | R   | R   | S   | R   | R   | R   | S   | S | S  | R  | R  | R   | R   | +    |
| <i>Buteo buteo</i>           | <i>C. freundii</i> *               | R   | R   | R   | S   | R   | R   | R   | S   | S | I  | R  | R  | R   | R   | -    |
| <i>Buteo buteo</i>           | <i>S. marcescens</i>               | S   | R   | R   | S   | S   | S   | S   | S   | S | S  | S  | S  | S   | S   | -    |
| <i>Buteo buteo</i>           | <i>E. coli</i> *                   | R   | S   | R   | S   | R   | R   | R   | S   | S | S  | R  | R  | R   | R   | -    |
| <i>Buteo buteo</i>           | <i>E. coli</i>                     | S   | S   | S   | S   | S   | S   | S   | S   | S | S  | S  | S  | S   | S   | -    |
| <i>Falco tinnunculus</i>     | <i>C. freundii</i> *               | R   | R   | R   | S   | R   | R   | R   | R   | R | S  | S  | R  | S   | R   | -    |
| <i>Falco tinnunculus</i>     | <i>K. pneumoniae</i> *             | R   | R   | S   | S   | R   | I   | R   | R   | S | S  | S  | R  | S   | R   | +    |
| <i>Falco tinnunculus</i>     | <i>E. coli</i> *                   | R   | R   | S   | S   | R   | I   | R   | R   | R | S  | S  | R  | R   | R   | -    |
| <i>Falco tinnunculus</i>     | <i>E. aerogenes</i> *              | R   | R   | R   | S   | S   | R   | R   | I   | S | S  | S  | R  | S   | R   | +    |

|                              |                                    |   |   |   |   |   |   |   |   |   |   |   |   |   |   |   |
|------------------------------|------------------------------------|---|---|---|---|---|---|---|---|---|---|---|---|---|---|---|
| <i>Falco tinnunculus</i>     | <i>E. coli</i> *                   | I | R | S | I | I | S | S | I | S | S | S | R | S | R | - |
| <i>Falco tinnunculus</i>     | <i>C. freundii</i> *               | I | R | R | R | I | S | I | R | S | S | S | R | S | R | - |
| <i>Falco tinnunculus</i>     | <i>E. coli</i> *                   | R | R | S | S | S | S | S | S | S | S | S | R | R | R | - |
| <i>Falco tinnunculus</i>     | <i>P. vulgaris</i>                 | S | R | R | S | S | S | I | S | S | S | S | S | S | S | - |
| <i>Falco tinnunculus</i>     | <i>E. coli</i>                     | R | R | S | S | S | S | S | S | S | S | R | S | S | I | - |
| <i>Falco tinnunculus</i>     | <i>S. marcescens</i>               | S | R | R | S | S | S | S | S | S | S | S | S | S | S | - |
| <i>Falco tinnunculus</i>     | <i>E. coli</i>                     | S | S | S | S | S | S | S | S | S | S | S | S | S | S | - |
| <i>Falco tinnunculus</i>     | <i>C. koseri</i>                   | S | R | S | S | S | S | S | S | S | S | S | S | S | S | - |
| <i>Falco tinnunculus</i>     | <i>E. coli</i>                     | I | S | S | I | R | S | I | R | S | S | S | S | S | S | - |
| <i>Falco tinnunculus</i>     | <i>E. coli</i>                     | S | S | S | S | S | S | S | S | S | S | S | S | S | S | - |
| <i>Falco tinnunculus</i>     | <i>E. coli</i>                     | S | S | S | S | R | S | I | S | S | S | S | S | S | S | - |
| <i>Falco tinnunculus</i>     | <i>E. coli</i> *                   | R | R | S | S | S | S | S | S | S | S | S | R | R | R | - |
| <i>Falco tinnunculus</i>     | <i>P. vulgaris</i>                 | S | R | S | S | S | S | S | S | S | S | S | S | S | S | - |
| <i>Columba livia</i>         | <i>E. cloacae</i>                  | S | R | R | S | S | S | S | S | S | S | S | S | S | S | - |
| <i>Columba livia</i>         | <i>E. coli</i>                     | R | S | S | S | S | S | I | S | S | S | S | S | S | S | - |
| <i>Columba livia</i>         | <i>E. coli</i>                     | S | S | S | S | S | S | S | S | S | S | S | S | S | S | - |
| <i>Columba livia</i>         | <i>S. enterica subsp. arizonae</i> | I | S | S | S | S | S | S | S | S | S | S | S | S | S | - |
| <i>Columba livia</i>         | <i>C. freundii</i>                 | S | R | R | S | S | S | S | S | S | S | S | S | S | S | - |
| <i>Columba livia</i>         | <i>E. coli</i>                     | S | S | S | S | S | S | S | S | S | S | S | S | S | S | - |
| <i>Columba livia</i>         | <i>E. coli</i>                     | S | S | S | S | S | S | S | S | S | S | S | S | S | S | - |
| <i>Columba livia</i>         | <i>E. coli</i>                     | S | S | S | S | S | S | S | S | S | S | S | S | S | S | - |
| <i>Columba livia</i>         | <i>E. coli</i> *                   | S | R | S | S | S | S | S | S | S | R | S | R | S | R | - |
| <i>Columba livia</i>         | <i>E. coli</i>                     | R | S | S | S | S | S | I | S | S | S | S | S | S | S | - |
| <i>Columba livia</i>         | <i>C. braakii</i>                  | S | R | R | S | S | S | S | S | S | S | S | S | S | S | - |
| <i>Columba livia</i>         | <i>E. coli</i>                     | R | S | S | S | S | S | I | S | S | S | S | S | S | S | - |
| <i>Columba livia</i>         | <i>C. freundii</i>                 | S | R | R | S | S | S | S | S | S | S | S | S | S | S | - |
| <i>Apus apus</i>             | <i>P. vulgaris</i>                 | S | R | S | S | S | S | S | S | S | S | S | R | S | S | - |
| <i>Apus apus</i>             | <i>E. aerogenes</i>                | S | R | R | S | S | S | S | S | S | S | S | S | S | S | - |
| <i>Apus apus</i>             | <i>E. coli</i>                     | S | S | S | I | S | S | S | S | S | S | S | R | S | S | - |
| <i>Apus apus</i>             | <i>S. liquefaciens</i>             | S | S | S | S | S | S | S | S | S | S | S | S | S | S | - |
| <i>Streptopelia decaocto</i> | <i>E. coli</i>                     | S | S | S | S | S | S | S | S | S | S | S | S | S | S | - |
| <i>Streptopelia decaocto</i> | <i>E. aerogenes</i>                | S | R | R | S | S | S | S | S | S | S | S | S | S | S | - |
| <i>Streptopelia decaocto</i> | <i>E. coli</i>                     | S | S | S | S | S | S | S | S | S | S | S | S | S | S | - |
| <i>Streptopelia decaocto</i> | <i>C. braakii</i>                  | S | R | S | S | R | S | I | S | S | S | S | S | I | S | - |

|                                      |                        |   |   |   |   |   |   |   |   |   |   |   |   |   |   |   |
|--------------------------------------|------------------------|---|---|---|---|---|---|---|---|---|---|---|---|---|---|---|
| <i>Fulica atra</i>                   | <i>E. coli</i> *       | S | R | S | S | S | R | S | R | S | S | S | S | S | S | - |
| <i>Bubo bubo</i>                     | <i>E. coli</i>         | I | S | S | S | I | S | I | I | S | S | S | S | S | S | - |
| <i>Upupa epops</i>                   | <i>E. coli</i>         | S | S | R | S | S | S | S | S | S | S | S | S | S | S | - |
| <i>Garrulus glandarius</i>           | <i>C. koseri</i>       | S | R | S | S | S | S | S | S | S | S | S | S | S | S | - |
| <i>Garrulus glandarius</i>           | <i>E. cloacae</i>      | S | R | R | S | S | S | S | S | S | S | S | S | S | S | - |
| <i>Garrulus glandarius</i>           | <i>E. coli</i>         | S | R | S | S | S | S | S | S | S | S | S | S | S | S | - |
| <i>Garrulus glandarius</i>           | <i>E. aerogenes</i>    | S | R | R | S | S | S | S | S | S | S | S | S | S | S | - |
| <i>Pica pica</i>                     | <i>E. cloacae</i>      | S | R | R | S | S | S | S | S | S | S | S | S | S | S | - |
| <i>Pica pica</i>                     | <i>E. coli</i>         | S | S | S | S | S | S | I | S | S | S | S | S | S | S | - |
| <i>Accipiter nisus</i>               | <i>E. cloacae</i>      | S | R | R | S | S | S | S | S | S | S | S | S | S | S | - |
| <i>Accipiter nisus</i>               | <i>E. coli</i>         | S | R | S | S | S | S | S | I | S | S | S | S | S | S | - |
| <i>Scolopax rusticola</i>            | <i>E. aerogenes</i>    | S | R | R | S | S | S | S | I | S | S | S | S | S | S | - |
| <i>Scolopax rusticola</i>            | <i>E. coli</i>         | R | R | R | I | R | R | R | R | R | R | R | R | R | R | - |
| <i>Scolopax rusticola</i>            | <i>E. coli</i>         | R | R | R | I | R | R | R | S | S | S | S | S | S | R | - |
| <i>Scolopax rusticola</i>            | <i>E. coli</i>         | S | S | S | S | S | S | S | S | S | S | S | S | S | S | - |
| <i>Scolopax rusticola</i>            | <i>S. marcescens</i>   | I | R | R | S | S | S | S | S | S | S | S | R | I | S | - |
| <i>Scolopax rusticola</i>            | <i>C. freundii</i>     | S | R | R | S | S | S | S | S | S | S | S | S | S | S | - |
| <i>Carduelis carduelis</i>           | <i>E. aerogenes</i>    | I | R | R | S | S | S | S | I | S | S | S | S | S | S | - |
| <i>Carduelis carduelis</i>           | <i>E. coli</i> *       | R | R | S | I | R | R | R | R | S | S | S | R | S | S | + |
| <i>Carduelis carduelis</i>           | <i>S. liquefaciens</i> | R | S | S | S | R | I | I | I | S | S | S | S | S | S | - |
| <i>Carduelis carduelis</i>           | <i>E. coli</i>         | I | R | S | S | R | I | R | S | S | S | S | S | S | S | - |
| <i>Carduelis carduelis</i>           | <i>C. braakii</i>      | S | S | S | S | S | S | S | S | S | S | S | S | S | S | - |
| <i>Coccothraustes coccothraustes</i> | <i>C. koseri</i>       | I | R | S | I | S | S | I | S | S | I | S | S | S | S | - |
| <i>Coccothraustes coccothraustes</i> | <i>E. coli</i>         | S | S | S | S | S | S | I | S | S | S | S | S | S | S | - |
| <i>Anas platyrhynchos</i>            | <i>E. coli</i>         | S | R | S | S | S | S | S | S | S | S | S | S | S | S | - |
| <i>Anas platyrhynchos</i>            | <i>C. koseri</i>       | S | R | S | S | S | S | S | S | S | S | S | S | S | S | - |
| <i>Anas platyrhynchos</i>            | <i>E. coli</i>         | S | S | S | S | S | S | S | S | S | S | S | S | S | S | - |
| <i>Anas platyrhynchos</i>            | <i>C. braakii</i>      | S | S | S | S | S | S | S | S | S | S | S | S | S | S | - |
| <i>Cygnus olor</i>                   | <i>E. coli</i>         | S | S | S | S | S | S | S | S | S | S | S | S | S | S | - |
| <i>Anas clypeata</i>                 | <i>S. odorifera</i>    | S | S | S | S | S | S | S | S | S | S | S | S | S | S | - |
| <i>Falco peregrinus</i>              | <i>E. coli</i> *       | I | R | S | S | S | I | S | R | S | I | S | R | S | R | - |
| <i>Falco peregrinus</i>              | <i>S. odorifera</i>    | R | R | S | S | S | S | S | R | S | S | S | S | S | S | - |
| <i>Falco peregrinus</i>              | <i>E. coli</i> *       | R | R | R | R | R | R | R | R | S | R | S | R | R | R | - |

|                             |                      |     |     |     |     |     |     |     |     |   |    |    |    |     |     |      |
|-----------------------------|----------------------|-----|-----|-----|-----|-----|-----|-----|-----|---|----|----|----|-----|-----|------|
| <i>Sylvia melanocephala</i> | <i>C. freundii</i>   | R   | R   | R   | S   | R   | S   | I   | S   | S | S  | S  | S  | S   | S   | -    |
| <i>Circaetus gallicus</i>   | <i>E. coli</i>       | S   | S   | S   | S   | S   | S   | S   | S   | S | S  | S  | S  | S   | S   | -    |
| <i>Turdus philomelos</i>    | <i>E. coli</i>       | I   | S   | S   | I   | R   | R   | R   | S   | S | S  | S  | S  | I   | S   | -    |
| <i>Tyto alba</i>            | <i>E. coli</i>       | S   | S   | S   | S   | S   | S   | S   | S   | S | S  | S  | S  | S   | S   | -    |
| <i>Tyto alba</i>            | <i>S. odorifera</i>  | S   | S   | S   | S   | S   | S   | S   | S   | S | S  | S  | S  | S   | S   | -    |
| <i>Tyto alba</i>            | <i>S. odorifera</i>  | S   | R   | S   | S   | S   | S   | S   | S   | S | S  | S  | S  | S   | S   | -    |
|                             | * multidrugs strains | PRL | AMP | AMC | IMI | CRO | CAZ | CPD | AZM | C | CN | AK | TE | CIP | SXT | ESBL |

PRL = piperacillin 100 µg, AMP = ampicillin, 10 µg; AMC = amoxycillin/clavulanic acid 30 µg; IMI= Imipenem 10 µg; CRO= ceftriaxone 30 µg; CAZ = ceftazidime, 30 µg; CPD= Cefpodoxime 10 µg; AZM= azithromycin 15 µg; C = chloramphenicol, 30 µg; CN = gentamicin, 10 µg; AK= amikacin 30 µg; TE = tetracycline, 30 µg; CIP = ciprofloxacin, 5 µg; SXT = sulphamethoxazole–trimethoprim, 1.25 + 23.75 µg; ESBL = Extended Spectrum Beta-Lactamase production

**Table S3. Results of antibiograms *S. aureus* strains**

| Bird species               | FOX | CN | E | TE | DO | CIP | DA | SXT |
|----------------------------|-----|----|---|----|----|-----|----|-----|
| <i>Accipiter nisus</i>     | R   | S  | S | S  | S  | S   | R  | S   |
| <i>Anas platyrhynchos</i>  | R   | S  | R | R  | R  | S   | R  | R   |
| <i>Buteo buteo</i>         | R   | S  | S | S  | S  | S   | R  | S   |
| <i>Carduelis carduelis</i> | R   | S  | R | R  | R  | S   | R  | R   |
| <i>Carduelis carduelis</i> | R   | S  | R | R  | R  | S   | R  | R   |
| <i>Carduelis carduelis</i> | R   | S  | R | R  | R  | S   | R  | R   |

FOX= cefoxitin 30 µg; CN = gentamicin, 10 µg; E= erythromycin 15 µg; TE = tetracycline, 30 µg; DO = doxycycline, 30 µg; CIP = ciprofloxacin, 5 µg; DA= clindamycin 2 µg; SXT = sulphamethoxazole–trimethoprim, 1.25 + 23.75 µg;

**Table S4. Results of antibiograms *Enterococcus* spp. strains**

| Bird species                        | P | E | DO | TE | CIP | RD | C |
|-------------------------------------|---|---|----|----|-----|----|---|
| <i>Athene noctua</i>                | I | S | S  | S  | S   | I  | S |
| <i>Buteo buteo</i>                  | R | R | R  | R  | S   | R  | S |
| <i>Buteo buteo</i>                  | R | R | R  | R  | S   | R  | S |
| <i>Carduelis carduelis</i>          | R | S | S  | S  | S   | I  | S |
| <i>Carduelis carduelis</i>          | S | S | S  | S  | S   | S  | S |
| <i>Columba livia</i><br>“domestica” | I | S | S  | S  | S   | S  | S |
| <i>Falco tinnunculus</i>            | R | R | R  | R  | S   | R  | S |
| <i>Falco tinnunculus</i>            | R | R | R  | R  | S   | R  | S |
| <i>Falco peregrinus</i>             | I | S | S  | S  | S   | S  | S |

P= penicillin 10 units; E= erythromycin 15 µg; DO = doxycycline, 30 µg; TE = tetracycline, 30 µg; CIP = ciprofloxacin, 5 µg; RD= rifampin 5 µg; C = chloramphenicol, 30 µg.

**Table S5. Results of antibiograms *P. aeruginosa* strains**

| Bird species               | PRL | CAZ | IMP | CT | CN | AK | CIP |
|----------------------------|-----|-----|-----|----|----|----|-----|
| <i>Buteo buteo</i>         | S   | S   | S   | S  | S  | S  | S   |
| <i>Buteo buteo</i>         | S   | S   | S   | S  | S  | S  | S   |
| <i>Buteo buteo</i>         | S   | S   | S   | S  | S  | S  | S   |
| <i>Carduelis carduelis</i> | S   | S   | S   | S  | S  | S  | S   |
| <i>Carduelis carduelis</i> | I   | S   | S   | S  | S  | S  | S   |
| <i>Carduelis carduelis</i> | I   | S   | S   | S  | S  | S  | S   |
| <i>Carduelis carduelis</i> | S   | S   | S   | S  | S  | S  | S   |
| <i>Carduelis carduelis</i> | S   | S   | S   | S  | S  | S  | S   |
| <i>Carduelis carduelis</i> | S   | S   | S   | S  | S  | S  | S   |
| <i>Carduelis carduelis</i> | I   | S   | S   | S  | S  | S  | S   |
| <i>Carduelis carduelis</i> | I   | S   | S   | S  | S  | S  | S   |
| <i>Carduelis carduelis</i> | S   | S   | S   | S  | S  | S  | S   |
| <i>Carduelis carduelis</i> | S   | S   | S   | S  | S  | S  | S   |
| <i>Carduelis carduelis</i> | I   | S   | S   | S  | S  | S  | S   |
| <i>Carduelis carduelis</i> | I   | S   | S   | S  | S  | S  | S   |
| <i>Carduelis carduelis</i> | S   | S   | S   | S  | S  | S  | S   |
| <i>Carduelis carduelis</i> | S   | S   | S   | S  | S  | S  | S   |
| <i>Carduelis carduelis</i> | S   | S   | S   | S  | S  | S  | S   |

PRL = piperacillin 100 µg; CAZ = ceftazidime, 30 µg; IMP = Imipenem, 10 µg; CN = gentamicin, 10 µg; CIP = ciprofloxacin, 5 µg; CT = colistin sulphate, 10 µg;
