# Supplementary material for: Prevalence and Phenotypic Antimicrobial Resistance among ESKAPE Bacteria and Enterobacterales Strains in Wild Birds
Source: MDPI journal article supplement (doi:10.3390/antibiotics11121825), 2022-12-15
Supplement: s1 [file s1]

Table S1 - Distribution and number/prevalence of isolates in bird species tested

| Isolated strains                     | <i>E. faecium</i> | <i>S. aureus</i> | <i>P. aeruginosa</i> | <i>E. cloacae</i> | <i>E. aerogenes</i> | <i>K. pneumoniae</i> | <i>Salmonella</i> spp. | <i>E.coli</i> | <i>Citrobacter</i> spp. | <i>Proteus</i> spp. | <i>Serratia</i> spp. |
|--------------------------------------|-------------------|------------------|----------------------|-------------------|---------------------|----------------------|------------------------|---------------|-------------------------|---------------------|----------------------|
| <b>Bird species</b>                  |                   |                  |                      |                   |                     |                      |                        |               |                         |                     |                      |
| <i>Accipiter nisus</i>               |                   | 1                |                      | 1                 |                     |                      |                        | 1             |                         |                     |                      |
| <i>Buteo buteo</i>                   | 2                 | 1                | 3                    | 2                 | 1                   | 3                    | 1                      | 11            | 2                       | 1                   | 1                    |
| <i>Circus gallicus</i>               |                   |                  |                      |                   |                     |                      |                        | 1             |                         |                     |                      |
| <i>Anas platyrhynchos</i>            |                   | 1                |                      |                   |                     |                      |                        | 2             | 2                       |                     |                      |
| <i>Anas clypeata</i>                 |                   |                  |                      |                   |                     |                      |                        |               |                         |                     | 1                    |
| <i>Cygnus olor</i>                   |                   |                  |                      |                   |                     |                      |                        | 1             |                         |                     |                      |
| <i>Apus apus</i>                     |                   |                  |                      |                   | 1                   |                      |                        | 1             |                         | 1                   | 1                    |
| <i>Columba livia "domestica"</i>     | 1                 |                  |                      | 1                 |                     |                      | 1                      | 8             | 3                       |                     |                      |
| <i>Streptopelia decaocto</i>         |                   |                  |                      |                   | 1                   |                      |                        | 2             | 1                       |                     |                      |
| <i>Garrulus glandarius</i>           |                   |                  |                      | 1                 | 1                   |                      |                        | 1             | 1                       |                     |                      |
| <i>Pica pica</i>                     |                   |                  |                      | 1                 |                     |                      |                        | 1             |                         |                     |                      |
| <i>Falco tinnunculus</i>             | 2                 |                  |                      |                   | 1                   | 1                    |                        | 9             | 3                       | 2                   | 1                    |
| <i>Falco peregrinus</i>              | 1                 |                  |                      |                   |                     |                      |                        | 2             |                         |                     | 1                    |
| <i>Carduelis carduelis</i>           | 2                 | 3                | 15                   |                   | 1                   |                      |                        | 2             | 1                       |                     | 1                    |
| <i>Coccothraustes coccothraustes</i> |                   |                  |                      |                   |                     |                      |                        | 1             | 1                       |                     |                      |
| <i>Fulica atra</i>                   |                   |                  |                      |                   |                     |                      |                        | 1             |                         |                     |                      |
| <i>Himantopus himantopus</i>         |                   |                  |                      |                   |                     |                      |                        | 1             |                         |                     |                      |
| <i>Scolopax rusticola</i>            |                   |                  |                      |                   | 1                   |                      |                        | 3             | 1                       |                     | 1                    |
| <i>Athene noctua</i>                 | 1                 |                  |                      |                   |                     |                      |                        |               |                         |                     |                      |
| <i>Bubo bubo</i>                     |                   |                  |                      |                   |                     |                      |                        | 1             |                         |                     |                      |
| <i>Sylvia melanocephala</i>          |                   |                  |                      |                   |                     |                      |                        |               | 1                       |                     |                      |
| <i>Turdus merula</i>                 |                   |                  |                      |                   |                     |                      |                        | 3             | 2                       |                     |                      |
| <i>Turdus philomelos</i>             |                   |                  |                      |                   |                     |                      |                        | 1             |                         |                     |                      |
| <i>Tyto alba</i>                     |                   |                  |                      |                   |                     |                      |                        | 1             |                         |                     | 2                    |
| <i>Upupa epops</i>                   |                   |                  |                      |                   |                     |                      |                        | 1             |                         |                     |                      |
| <b>Total strains (number)</b>        | 9                 | 6                | 18                   | 6                 | 7                   | 4                    | 2                      | 55            | 18                      | 4                   | 9                    |
| <b>Prevalence (%)</b>                | 5.5               | 3.6              | 11.0                 | 3.6               | 4.2                 | 2.4                  | 1.2                    | 33.7          | 11.0                    | 2.4                 | 5.5                  |
| <b>(95% CI %)</b>                    | 2.71 - 10.5       | 1.50 - 8.19      | 6.85 - 17.1          | 1.50 - 8.19       | 1.81 - 8.99         | 0.78 - 6.56          | 0.21 - 4.82            | 26.6 - 41.6   | 6.85 - 17.1             | 0.78 - 6.56         | 2.71 - 10.5          |
